# Supplementary material for: Unique and universal dew-repellency of nanocones
Source: PubMed Central journal article supplement (PMC8187394; doi:10.1038/s41467-021-23708-6), 2021-06-08
Supplement: 41467_2021_23708_MOESM3_ESM.pdf [file 41467_2021_23708_MOESM3_ESM.pdf]

## **Description of Additional Supplementary Files**

### **Supplementary Movie 1**

Breath figures on samples E4, T1 and T4. Supersaturation  $S$  is maintained at a constant value  $1.6 \pm 0.2$ . The real duration of the experiment is 30 min.
